# Supplementary material for: Elevated Nicotinamide Phosphoribosyl Transferase in Skeletal Muscle Augments Exercise Performance and Mitochondrial Respiratory Capacity Following Exercise Training
Source: Front Physiol. 2018 Jun 11;9:704. doi: 10.3389/fphys.2018.00704 (PMC6004371; doi:10.3389/fphys.2018.00704)
Supplement: Supplementary file 1 [file Data_Sheet_1.DOCX]

Supplementary Material

Elevated nicotinamide phosphoribosyl transferase in skeletal muscle augments exercise performance and mitochondrial respiratory capacity following exercise training

Bram Brouwers1, Natalie A. Stephens1, Sheila R. Costford2,3, Meghan E. Hopf2, Julio E. Ayala2, Fanchao Yi1, Hui Xie1, Jian-Liang Li2, Stephen J. Gardell2, Lauren M. Sparks1,2, Steven R. Smith1,2,*

*** Correspondence:** Dr. Steven R. Smith: [Steven.R.Smith.MD@flhosp.org](mailto:Steven.R.Smith.MD@flhosp.org)

# Supplementary Data

## NAMPT western blot

### NAMPT protein content

##



### Α-tubulin

##



## SIRT3 western blot

### SIRT3 protein content


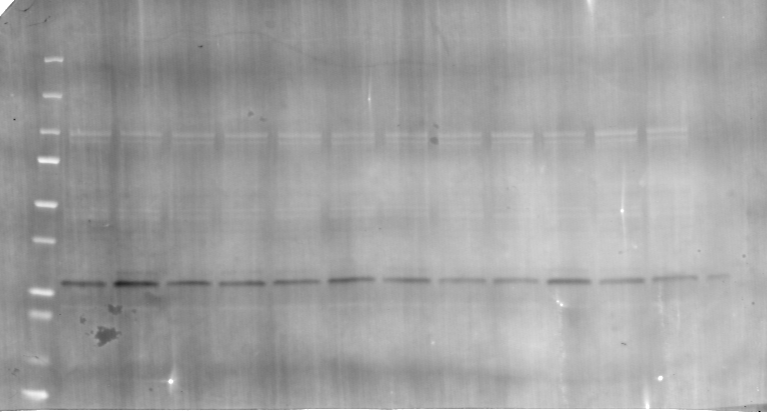


### A-tubulin


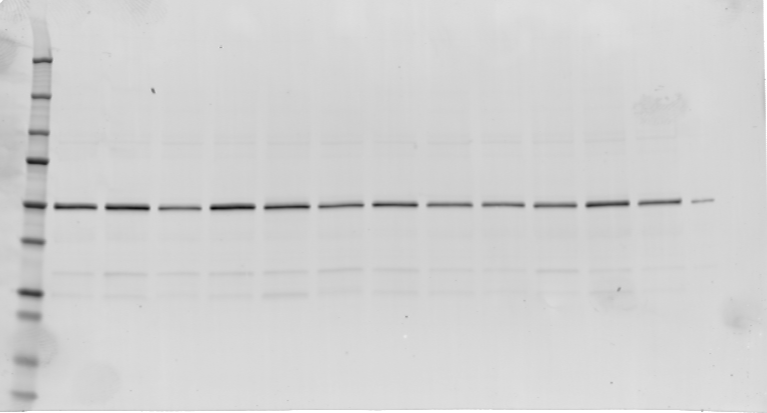


## CAT western blot

### CAT protein content


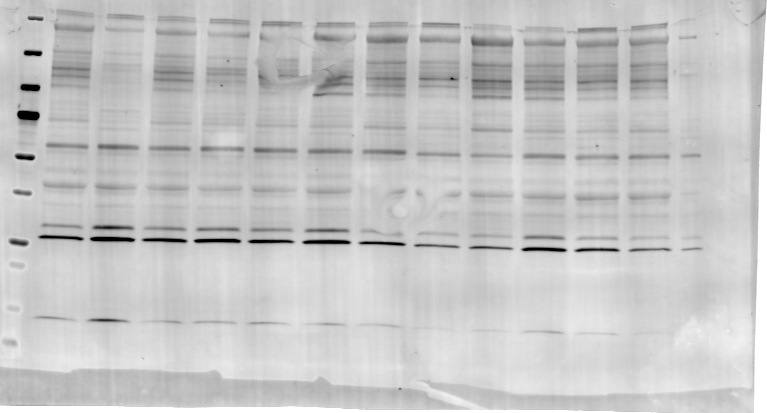


### A-tubulin


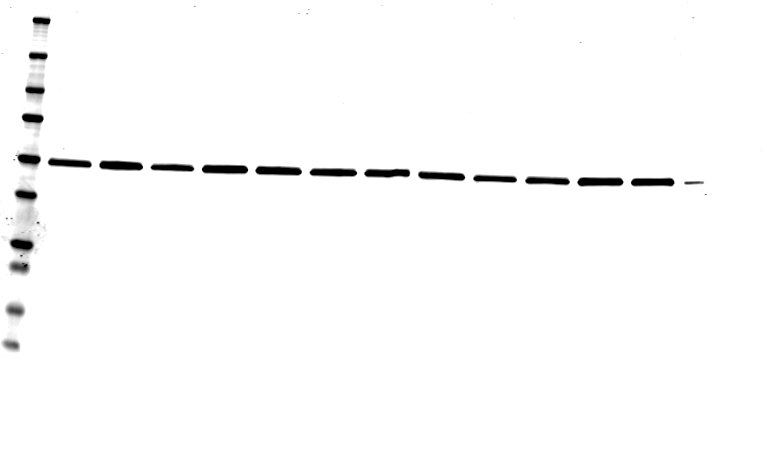


## MFN2 western blot

### MFN2 protein content


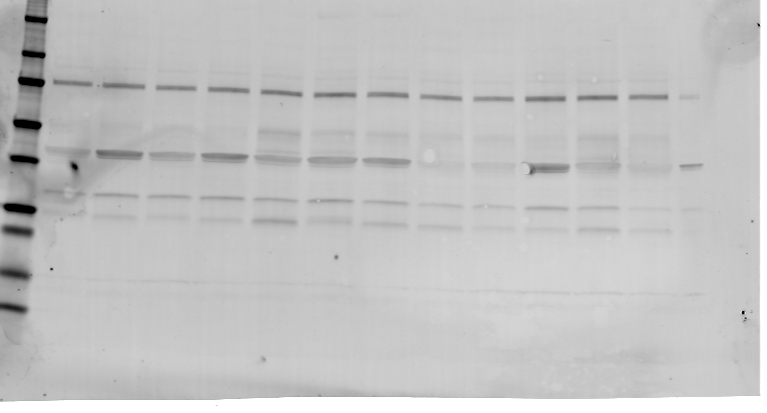


### A-tubulin


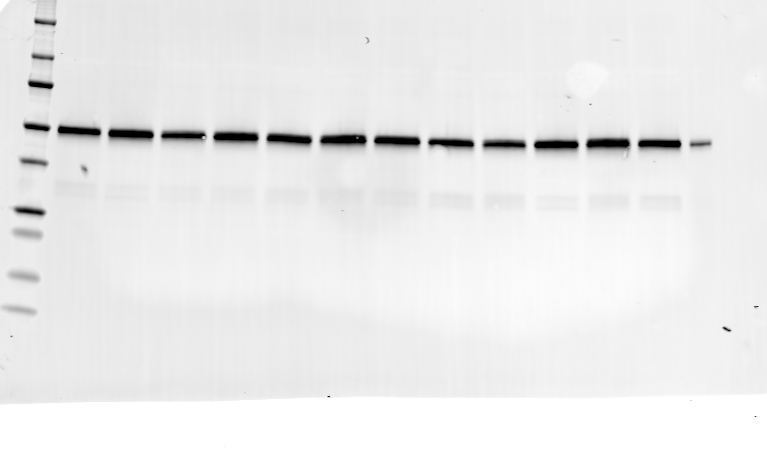


## LCAD western blot

### LCAD protein content





### A-tubulin
